# Supplementary material for: Single-Cell RNA Sequencing Reveals Alterations in Patient Immune Cells with Pulmonary Long COVID-19 Complications
Source: MDPI journal article supplement (doi:10.3390/cimb46010029), 2024-01-02
Supplement: s1 [file s1]

## Supplementary figure S1 for Fig. 1.

| Cluster | Colour | Bubbles in receding order |                 |                           |                 |               |               |                 |               |                     |                   |
|---------|--------|---------------------------|-----------------|---------------------------|-----------------|---------------|---------------|-----------------|---------------|---------------------|-------------------|
| 0       |        | CD8+ NKT                  | Effector CD8+ T | CD4+ NKT                  | T cells         | Memory CD8+ T | Naive CD8+ T  | ISG+ cells      | Memory CD4+ T | Naive CD4+ T        |                   |
| 5       |        | Classical Monocytes       | Inf. Monocytes  | Non-classssical monocytes | Neutrophils     | Monocytes     | Granulocytes  | mDCs            | pDCs          | ISG+ cells          | HPS/MPP           |
| 6       |        | NK                        | CD8+ NKT        | CD4+ NKT                  | Granulo.        | ISG+ cells    | T cells       | Effector CD8+ T | Naive CD8+ T  | Plasma B            | Non-callical mono |
| 7       |        | Memory B                  | Naive B         | Pre-B                     | Pro-B           | mDCs          | pDCs          | Plasma B        | Mast cells    | Monocytes           | HPS/MPP           |
| 3       |        | Memory CD4+ T             | Memory CD8+ T   | Effector CD4+ T           | Effector CD8+ T | T cells       | Megakarocytes | HPS/MPP         | Eosinophils   | Naive CD8+ T        |                   |
| 1       |        | Naive CD4+ T              | Memory CD4+ T   | Naive CD8+ T              | Memory CD8+ T   |               |               |                 |               |                     |                   |
| 4       |        | Memory CD4+ T             | Memory CD8+ T   | Naive CD4+ T              | Effector CD4+ T | Megakarocytes | T cells       | Cancer          | HPS/MPP       |                     |                   |
| 7       |        | Non-classical Mono        | Monocytes       | Inf. Monocytes            | Granulocytes    | mDCs          | pDCs          | Neutrophils     | ISG+ cells    | Classical Monocytes |                   |
| 2       |        | Eosinophils               | Granulocytes    | HPS/MPP                   | Basophils       |               |               |                 |               |                     |                   |
| 8       |        | Naive CD4+ T              | Naive CD8+ T    | Cancer                    | Effector CD4+ T |               |               |                 |               |                     |                   |

Figure S1. ScType bubble plot results presented by the cell type likelihood in a receding order (corresponding to Fig. 1B).
